# Supplementary figures and images for: The Mitochondrial Genome of a Plant Fungal Pathogen Pseudocercospora fijiensis (Mycosphaerellaceae), Comparative Analysis and Diversification Times of the Sigatoka Disease Complex Using Fossil Calibrated Phylogenies
Source: MDPI journal article supplement (doi:10.3390/life11030215), 2021-03-09

■ rRNA 
 ■ protein-coding gene 
 ■ internal ORF (HEG) 
 ■ CDS 
 ■ tRNA

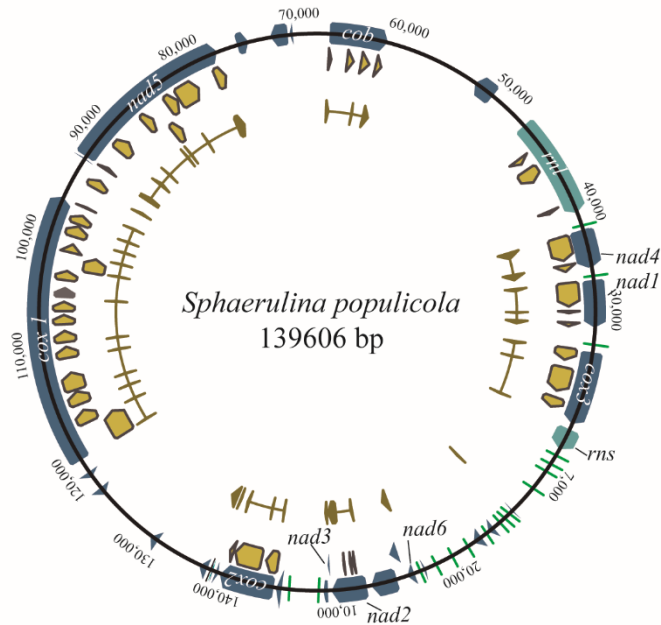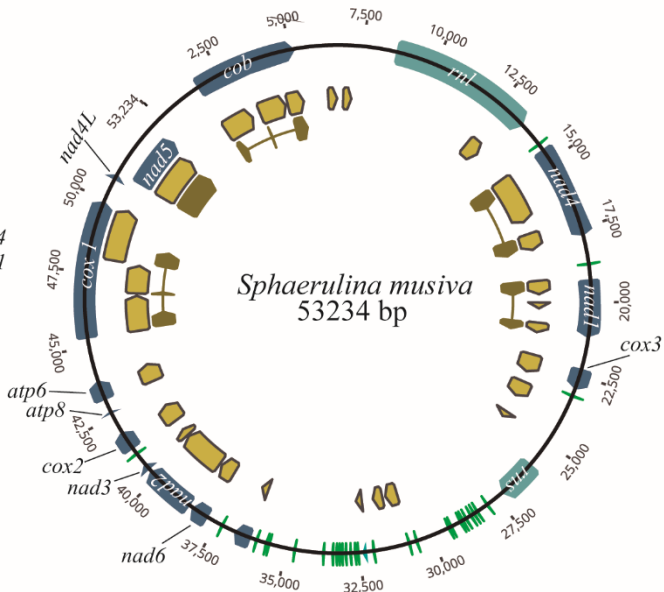

Supplement: s1 [file s1]
